# Supplementary material for: Resident reflections on end-of-life education: a mixed-methods study of the 3 Wishes Project
Source: PubMed Central journal article supplement — BMJ Open. 2016 Mar 31;6(3):e010626. doi: 10.1136/bmjopen-2015-010626 (PMC4823392; doi:10.1136/bmjopen-2015-010626), 2016-03-31
Supplement: bmjopen-2015-010626supp_appendix.pdf [file bmjopen-2015-010626supp_appendix.pdf]

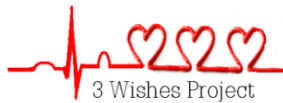

## **ICU Clinician Interview Guide**

Thank you so much for meeting with me today and participating in this study. As you know, we are trying to understand the effect of the 3 Wishes Project on ICU staff. This interview is specifically about the 3 Wishes related to \_\_\_\_\_. Please let me know if there are any questions that you don't want to answer. We can stop at any time if you need to, or we can stop the interview completely if it is too difficult.

I know you were involved in caring for \_\_\_\_\_ in the ICU.

1. Can you tell me how you came to know \_\_\_\_\_ and her/his family in the ICU?
2. Can you tell me how involved you were in their care?
3. In your view, did the 3 Wishes Project have any influence on the dying experience for \_\_\_\_\_ as s/he was dying? Please describe (probes: personalize/humanize/add meaning to).
4. In your view, did the 3 Wishes Project have any influence on the family as \_\_\_\_\_ was dying? Please describe (probes: personalize/humanize/add meaning to).
5. Do you think the project had any influence on the family after the patient's death? Please describe (probes: personalize/humanize/add meaning to).
6. What do you think was the most important aspect of the 3 Wishes Project for \_\_\_\_\_? (why do you think so?). How about for the family? (why do you think so?).
7. Thinking of \_\_\_\_\_ and this family, what would you describe as the most important aspect of the 3 Wishes Project for you personally?
8. Were there any aspects of the 3 Wishes Project that you think were unhelpful?
9. Can you describe any impact the 3 Wishes Project had on you as a clinician caring for this patient and family? (probe: what will you take with you into your future clinical practice).  
For residents/fellows: Please describe what training you've had to date (both formal and informal) on EOL care. Do you think there is a role for the 3Wishes Project in educating clinicians in training about EOL care?
10. If you could have had a wish for this patient, what would it have been? If you could have had a wish for any of \_\_\_\_\_'s family members, what would it have been? If you could have had a wish for yourself in caring for this person, what would it have been?

11. Do you see yourself as a religious or spiritual person? If so, in what way?
12. Are you affiliated with a religious or spiritual denomination or community? If so, which one?
13. Has your religion or spirituality been involved in the way you have engaged your work in the ICU? If so, in what way?
14. Would you describe your experience of 3Wishes as a spiritual (or religious) experience.? If so, in what ways? Do you think the 3 Wishes Project facilitated the presence of spirituality or religion in the dying process? If so, please describe in what ways/how? If not, do you think the 3Wishes Project has the potential to facilitate the presence of spirituality or religion in the dying process? If yes, how?
15. We have been developing a wish bank to assist patients and families with choosing their wishes. Can you suggest any other wishes that would have been appropriate for this patient either before or after their death? For their family – either before or after the patient’s death? Can you suggest any wishes to include in the wish bank for future patients and their families? (probe: post-mortem wishes)
16. Can you describe how you think things were different for this patient and family as a result of their involvement in the Three Wishes Project? (probe: compared to if they hadn’t been involved in the project?)
14. Do you think the 3 Wishes Project should continue? Why or why not?
15. Do you have suggestions to improve the experience for future families who will be involved in the 3 Wishes Project? How about ways to improve the experience for future ICU clinicians?
16. How has this interview experience been for you?
17. Before we finish, can I please ask you a few demographic questions to help us describe the sample of clinicians we are interviewing?

a) Age?

b) Year of Practice in Critical Care

Thank you so much for taking the time to speak with me.  
I’d like to give you this (Tim Horton’s gift card) as a token of our appreciation.
